# Supplementary material for: Phytochemical-Stabilized Platinum-Decorated Silver Nanocubes INHIBIT Adenocarcinoma Cells and Enhance Antioxidant Effects by Promoting Apoptosis via Cell Cycle Arrest
Source: Pharmaceutics. 2022 Nov 21;14(11):2541. doi: 10.3390/pharmaceutics14112541 (PMC9693179; doi:10.3390/pharmaceutics14112541)
Supplement: Supplementary file 1 [file pharmaceutics-14-02541-s001.zip › pharmaceutics-2007774-supplementary.pdf]

## **Supplementary Information**

### **Phytochemical-stabilized platinum-decorated silver nanocubes inhibit adenocarcinoma cells and enhance antioxidant effects by promoting apoptosis via cell cycle arrest**

Adewale O. Oladipo <sup>1\*</sup>, Jeremiah O. Unuofin <sup>1</sup>, Sogolo L. Lebelo <sup>1</sup>, Titus A.M. Msagati <sup>2</sup>

<sup>1</sup>Department of Life and Consumer Sciences, College of Agriculture and Environmental Sciences, University of South Africa, Private Bag X06 Florida 1710, South Africa

<sup>2</sup>Institute for Nanotechnology and Water Sustainability (iNanoWS), College of Science, Engineering and Technology, University of South Africa, Private Bag X06 Florida 1710, South Africa

Author for correspondence: oladiao@unisa.ac.za

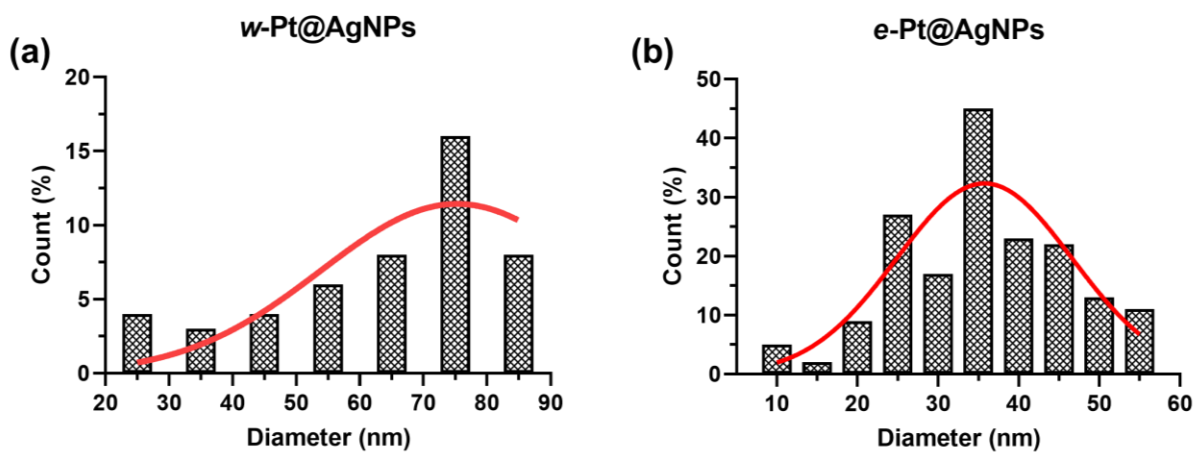

**Figure S1.** Particle size distribution showing the average diameter of *w*-Pt@AgNPs and *e*-Pt@AgNPs.

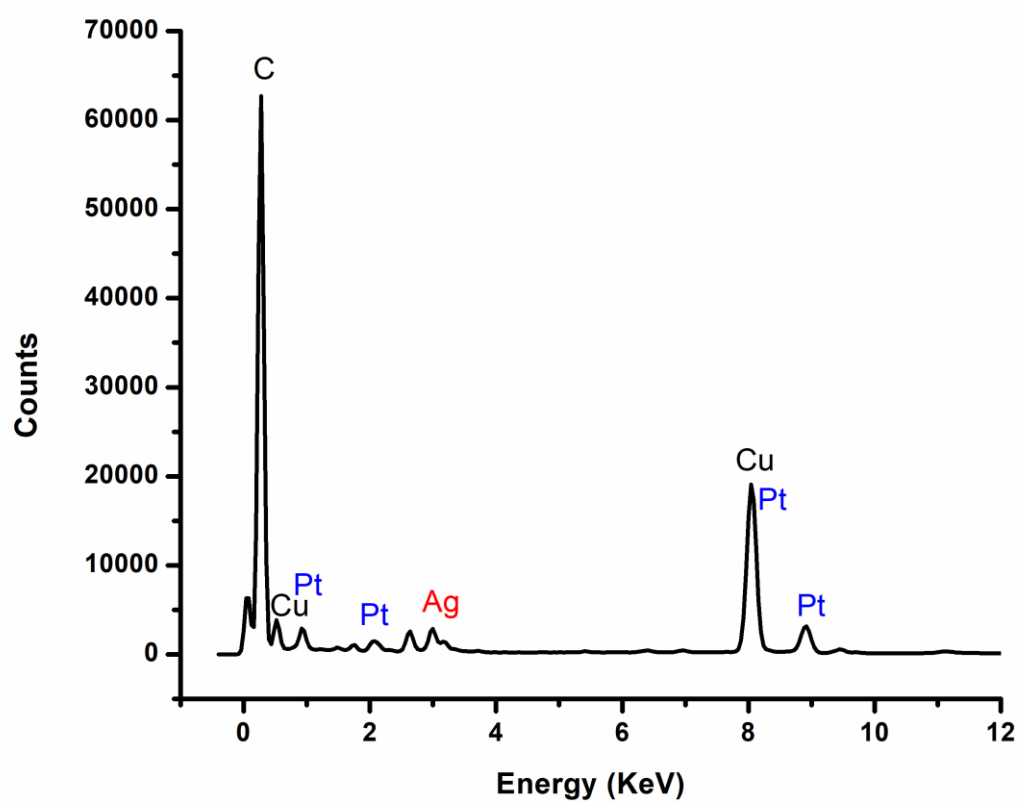

**Figure S2.** Representative EDS profile of *e*-Pt@AgNPs confirming the presence of Ag and Pt metals.

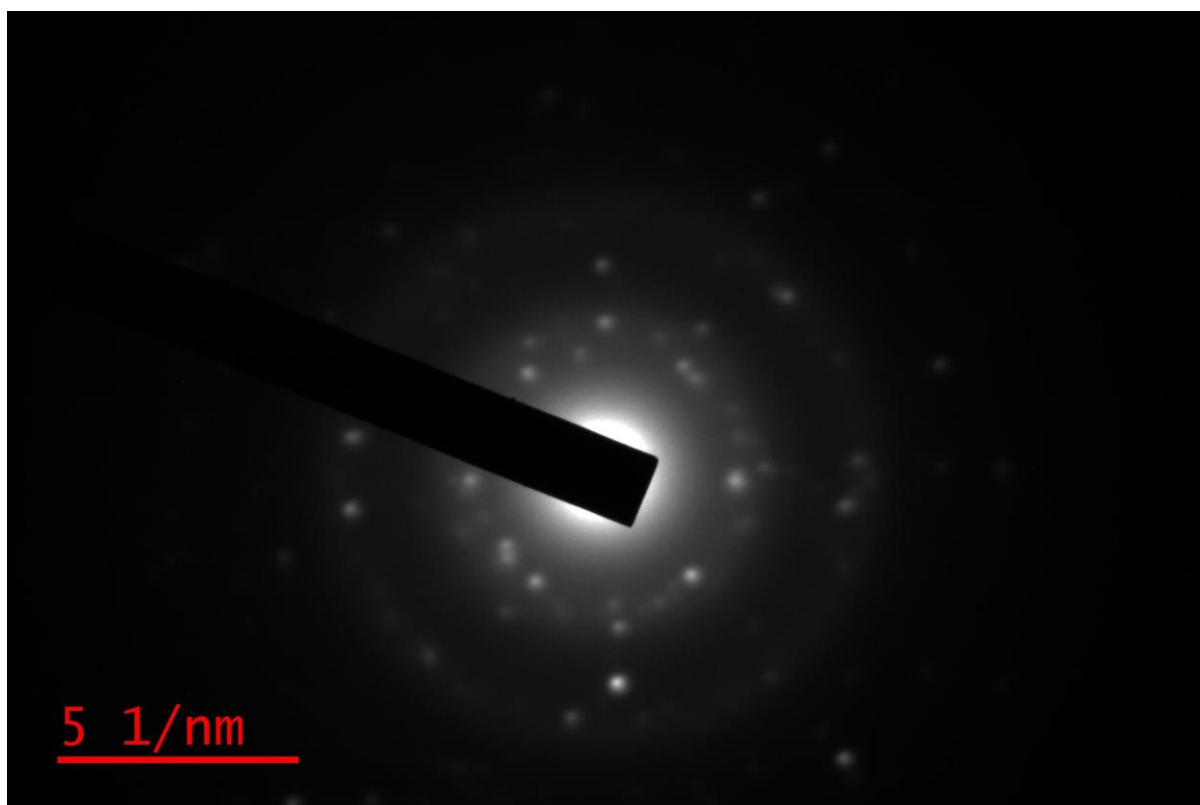

**Figure S3.** Selected area electron diffraction (SAED) pattern of *e*-Pt@AgNPs.

**Table S1.** Zeta-potential and polydispersity index (PDI) of *w*-Pt@AgNPs (Mean  $\pm$ SD; n=3).

| Days | Particle size (nm) | PDI   | Zeta potential (mV) |
|------|--------------------|-------|---------------------|
| 0    | 84.2 $\pm$ 1.39    | 0.220 | -30.3 $\pm$ 2.81    |
| 1    | 85.3 $\pm$ 0.45    | 0.214 | -30.2 $\pm$ 1.66    |
| 2    | 85.1 $\pm$ 2.08    | 0.184 | -30.5 $\pm$ 2.13    |
| 3    | 85.4 $\pm$ 1.91    | 0.209 | -30.4 $\pm$ 2.53    |
| 4    | 85.7 $\pm$ 3.12    | 0.216 | -30.3 $\pm$ 4.31    |
| 5    | 86.0 $\pm$ 1.87    | 0.197 | -30.6 $\pm$ 3.82    |

**Table S2.** Zeta-potential and polydispersity index (PDI) of *e*-Pt@AgNPs (Mean  $\pm$ SD; n=3).

| Days | Particle size (nm) | PDI   | Zeta potential (mV) |
|------|--------------------|-------|---------------------|
| 0    | 39.4 $\pm$ 2.01    | 0.109 | -25.0 $\pm$ 2.11    |
| 1    | 39.3 $\pm$ 1.34    | 0.213 | -24.8 $\pm$ 3.02    |
| 2    | 39.7 $\pm$ 3.12    | 0.401 | -25.3 $\pm$ 1.06    |
| 3    | 39.8 $\pm$ 2.63    | 0.311 | -25.4 $\pm$ 1.66    |
| 4    | 40.1 $\pm$ 4.07    | 0.342 | -25.3 $\pm$ 1.31    |
| 5    | 40.4 $\pm$ 5.42    | 0.308 | -26.0 $\pm$ 2.17    |
